# Supplementary material for: Biostimulant effects of titanium dioxide nanoparticles on germination and initial growth of tomato: evidence of hormesis
Source: PeerJ. 2025 Dec 16;13:e20516. doi: 10.7717/peerj.20516 (PMC12716138; doi:10.7717/peerj.20516)
Supplement: Supplemental Information 1 [file peerj-13-20516-s001.xlsx]

## Sheet: Hoja1
RAW DATA
Supplementary Material S1
Titanium Enhances Germination, Biomass Accumulation and Initial Growth in Tomato and Stimulates Stem and Root Length in a Hormetic Manner
Víctor Hugo Carbajal-Vázquez, Libia Iris Trejo-Téllez, Josafhat Salinas-Ruíz, Fernando Carlos Gómez-Merino*
Raw data of the dependent variables measured to test the effect of titanium on germination and initial growth of tomato
Ti (mM)	Seed weight increase after imbibition (%)	Total germination percentage	Germination speed coefficeint	Vigor index I	Vigor index II	Root length (cm)	Stem length (cm)	Number of lateral roots	Number of leaves	Water content in roots (%)	Water content in stems (%)	Water content in leaves (%)	Fresh biomass of roots, g	Dry biomass of roots, g	Fresh biomass of stems, g	Dry biomass of stems, g	Fresh biomass of leaves, g	Dry biomass of leaves, g	Fresh biomass of seedling, g	Dry biomass of seedlin, g
0	141.404	70	0.184211	925.299	29.63	9.20314	4.0154	4.28	1.57	88.6883	95.4939	91.921	0.0831	0.0094	0.1731	0.0078	0.1671	0.0135	0.4233	0.0307
0	162.687	100	0.163934	1179.09	57.51	8.5951	3.1958	3.8	1.4	92.234	95.0985	91.5433	0.188	0.0146	0.1979	0.0097	0.1892	0.016	0.5751	0.0403
0	162.59	100	0.16129	1407.11	57.87	10.4168	3.6543	3.55	1.33	93.5016	95.368	91.4733	0.1862	0.0121	0.1943	0.009	0.1982	0.0169	0.5787	0.038
52.2	184	80	0.156863	1341.97	38.87	12.1956	4.579	3.87	1.37	93.5775	95.2482	91.5655	0.1884	0.0121	0.141	0.0067	0.1565	0.0132	0.4859	0.032
52.2	135.965	90	0.169811	1175.17	46.75	9.42611	3.6313	2.88	0.77	92.545	95.1456	91.7889	0.1945	0.0145	0.1545	0.0075	0.1705	0.014	0.5195	0.036
52.2	169.504	90	0.176471	1169.61	54.1	9.61133	3.3843	3.88	0.77	93.5236	95.1163	92.1305	0.2208	0.0143	0.172	0.0084	0.2084	0.0164	0.6012	0.0391
104.4	149.603	80	0.195122	919.68	40.04	7.55914	3.9368	4.14	1	94.6898	96.9966	94.2352	0.1789	0.0095	0.1465	0.0044	0.1752	0.0101	0.5006	0.024
104.4	182.869	70	0.132075	840.98	31.04	8.1095	3.9045	3.66	1	91.0631	95.0355	92.2111	0.1712	0.0153	0.1128	0.0056	0.1592	0.0124	0.4432	0.0333
104.4	186.92	90	0.204545	1068.6	38.74	8.15557	3.7178	3.57	0.71	94.2988	96.1897	92.2974	0.1526	0.0087	0.1286	0.0049	0.1493	0.0115	0.4305	0.0251
156.6	148.162	90	0.136364	1724.6	45.89	14.363	4.7951	3.37	1	94.0214	96.3869	92.6359	0.1589	0.0095	0.1799	0.0065	0.1711	0.0126	0.5099	0.0286
156.6	168.127	100	0.227273	1365.1	62.72	9.9225	3.7285	2.8	1.4	93.8852	95.5249	91.9825	0.2404	0.0147	0.181	0.0081	0.2058	0.0165	0.6272	0.0393
156.6	145.852	80	0.108108	1338.32	44.39	12.6189	4.111	3.87	0.75	94.4186	95.7493	92.4115	0.1935	0.0108	0.1835	0.0078	0.1779	0.0135	0.5549	0.0321
208.8	155.656	90	0.160714	1460.79	46.88	12.4361	3.7948	4	1.37	94.2167	96.197	93.0921	0.1781	0.0103	0.1604	0.0061	0.1824	0.0126	0.5209	0.029
208.8	118.824	100	0.16129	1590.83	73.39	11.7724	4.1359	3.7	1.3	95.1171	95.7599	93.2549	0.3031	0.0148	0.2099	0.0089	0.2209	0.0149	0.7339	0.0386
208.8	128.455	100	0.12987	1405.27	64.86	10.136	3.9167	4.6	1.4	92.8667	95.1958	95.7904	0.2243	0.016	0.1915	0.0092	0.2328	0.0098	0.6486	0.035
